# Supplementary material for: The Porcine MicroRNA Transcriptome Response to Transmissible Gastroenteritis Virus Infection
Source: PubMed Central journal article supplement (PMC4363316; doi:10.1371/journal.pone.0120377), 2015-03-17

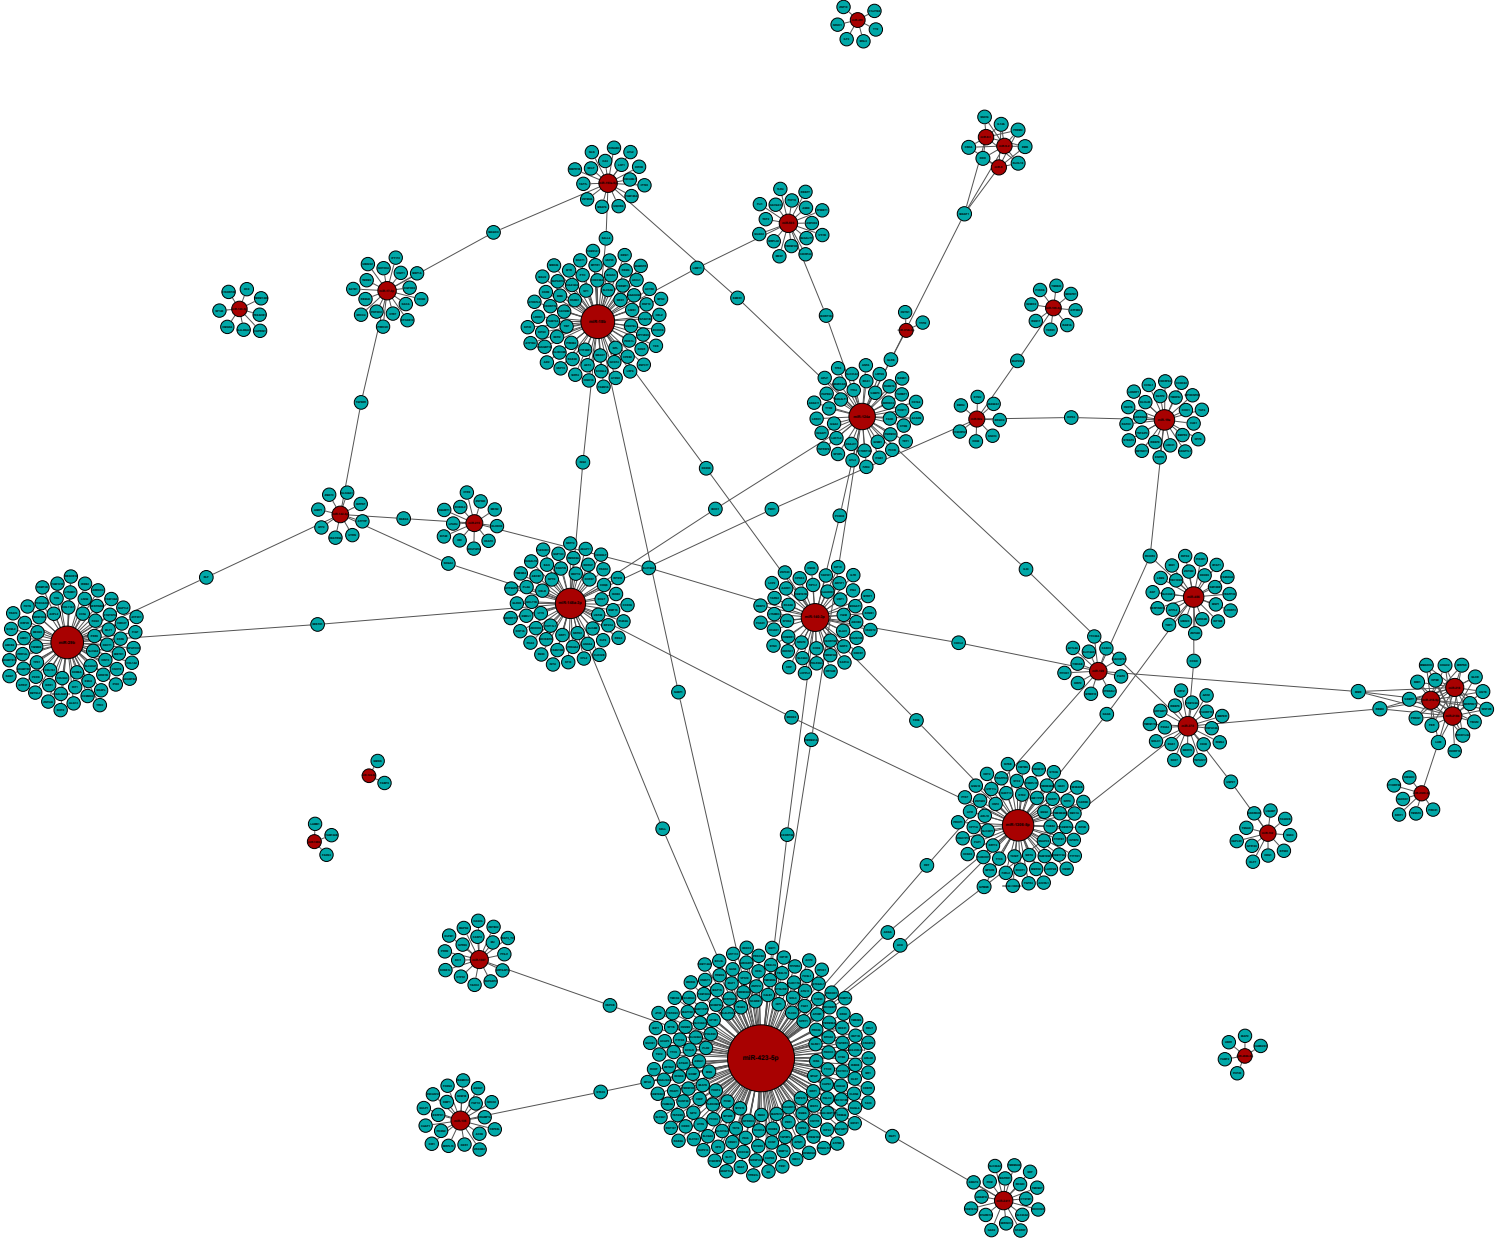

Supplement: pone.0120377.s002.pdf [file pone.0120377.s002.pdf]
